# Supplementary material for: Nanoantenna enhanced emission of light-harvesting complex 2: the role of resonance, polarization, and radiative and non-radiative rates
Source: Royal Society of Chemistry journal article supplement (doi:10.1039/c4cp03636k), 2014-01-01
Supplement: c4cp03636k1.pdf [file c4cp03636k1.pdf]

## ELECTRONIC SUPPLEMENTARY INFORMATION

### ESI 1

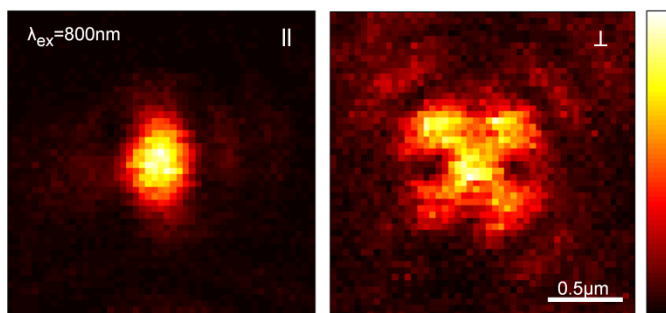

**Fig. 1** High resolution confocal scan of  $L=150$  nm NR-LH2 hybrid oriented parallel ( $//$ ) or perpendicular ( $\perp$ ) with respect to the excitation light,  $\lambda=800$  nm. Focusing a x-polarized excitation beam with a high NA objective results mostly in x-polarisation in the central spot, but a fraction of the light is distributed in four lobes and polarized in the orthogonal y-direction.<sup>1</sup> These four lobes are clearly visible for the  $\perp$ -NR as the depolarized light is resonant with the longitudinal antenna-mode leading to enhanced excitation.

### ESI 2

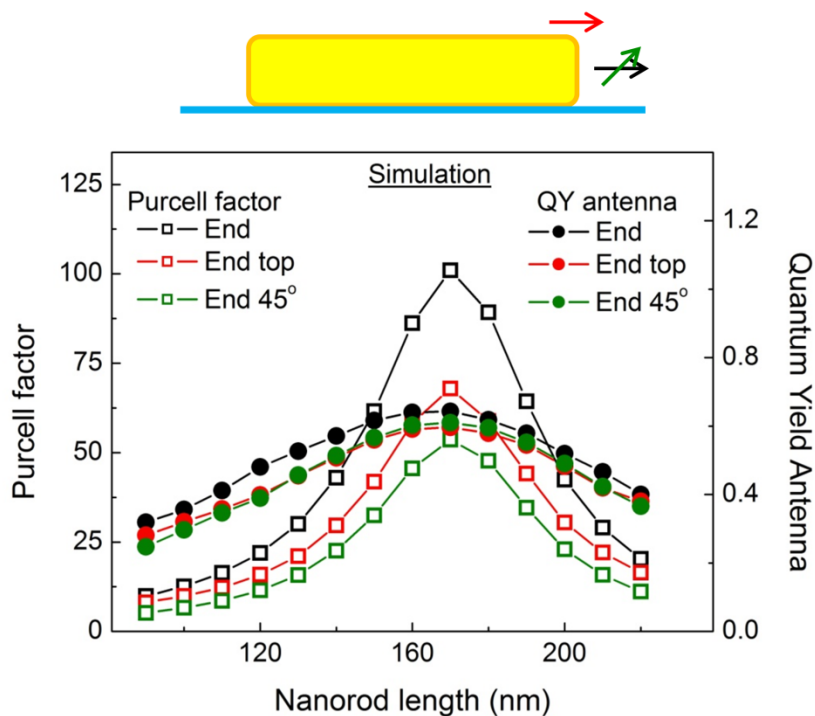

**Fig. 2** The antenna efficiency as function of dipole position. The dipole source was positioned at three locations: (1) in front and in line with the antenna long-axis, (2) on top of the antenna and in line, and (3) in front tilted  $45^\circ$  with respect to the antenna long-axis, as indicated in the figure. The largest Purcell factor is found for the dipole in line and parallel with respect to the antenna long-axis, however the antenna efficiency is comparable for the different orientations.

### Reference

1. L. Novotny and B. Hecht, *Principles of Nano-Optics*, Cambridge University Press, Cambridge, 2012.
